# Supplementary material
Source: HighWire-hosted journal article supplement (http://www.qdcxjkg.com/highwire/filestream/132601/field_highwire_adjunct_files/0/ERJ-00673-2016_Supplementary_material.pdf)
Supplement: ERJ-00673-2016_Supplementary_material.pdf [file ERJ-00673-2016_Supplementary_material.pdf]

Table E1 Relative risks of asthma at 7 years in children born to mothers with pre-eclampsia when excluding women with chronic hypertension before pregnancy

| <b>Registry linkage (n= 404,626)</b>            |         |          |                        |                                    |
|-------------------------------------------------|---------|----------|------------------------|------------------------------------|
| Pre-eclampsia                                   | n       | % asthma | Unadjusted RR (95% CI) | Adjusted RR (95 % CI) <sup>a</sup> |
| No                                              | 388,769 | 3.5      | 1                      | 1                                  |
| Yes                                             | 15,857  | 4.9      | 1.37 (1.27, 1.47)      | 1.31 (1.22, 1.40)                  |
| Pre-eclampsia in combination with preterm birth | n       | % asthma | Unadjusted RR (95% CI) | Adjusted RR (95 % CI) <sup>a</sup> |
| Neither                                         | 371,352 | 3.4      | 1                      | 1                                  |
| Preterm birth only                              | 17,417  | 6.0      | 1.73 (1.63, 1.85)      | 1.65 (1.55, 1.76)                  |
| Pre-eclampsia only                              | 12,180  | 4.4      | 1.27 (1.16, 1.38)      | 1.20 (1.10, 1.31)                  |
| Preeclampsia and preterm birth                  | 3,677   | 6.5      | 1.89 (1.67, 2.15)      | 1.86 (1.64, 2.10)                  |
| Relative excess risk due to interaction         |         |          | -0.11 (-0.38, 0.17)    | 0.00 (-0.27, 0.27)                 |
| <b>MoBa (n= 44,780)</b>                         |         |          |                        |                                    |
| Pre-eclampsia                                   | n       | % asthma | Unadjusted RR (95% CI) | Adjusted RR (95 % CI) <sup>b</sup> |
| No                                              | 43,083  | 4.8      | 1                      | 1                                  |
| Yes                                             | 1,697   | 6.4      | 1.35 (1.12, 1.63)      | 1.20 (1.00, 1.46)                  |
| Pre-eclampsia in combination with preterm birth | n       | % asthma | Unadjusted RR (95% CI) | Adjusted RR (95 % CI) <sup>b</sup> |
| Neither                                         | 41,466  | 4.7      | 1                      | 1                                  |
| Preterm birth only                              | 1,617   | 7.1      | 1.52 (1.27, 1.83)      | 1.40 (1.16, 1.68)                  |
| Pre-eclampsia only                              | 1,322   | 5.3      | 1.14 (0.90, 1.43)      | 1.02 (0.81, 1.29)                  |
| Preeclampsia and preterm birth                  | 375     | 10.4     | 2.23 (1.65, 3.01)      | 1.91 (1.41, 2.57)                  |
| Relative excess risk due to interaction         |         |          | 0.57 (-0.19, 1.33)     | 0.49 (-0.18, 1.16)                 |

<sup>a</sup> Adjusted for maternal age, parity, education, asthma and child gender.

<sup>b</sup> Adjusted for maternal age, parity, education, asthma and child gender, maternal smoking during pregnancy and pre-pregnancy body-mass index.

Table E2 Relative risks of asthma at 7 years in children born to mothers with pre-eclampsia when excluding women results from multiple imputation analysis

| <b>Registry linkage (n=406,907)</b>             |         |          |                        |                                    |                                      |
|-------------------------------------------------|---------|----------|------------------------|------------------------------------|--------------------------------------|
| Pre-eclampsia                                   | n       | % asthma | Unadjusted RR(95% CI)  | Adjusted RR (95 % CI) <sup>a</sup> | Adjusted RR (95 % CI) <sup>a,b</sup> |
| No                                              | 390,578 | 3.6      | 1                      | 1                                  | 1                                    |
| Yes                                             | 16,329  | 4.9      | 1.37 (1.28, 1.47)      | 1.31 (1.22, 1.40)                  | 1.31 (1.22, 1.40)                    |
| Pre-eclampsia in combination with preterm birth | n       | % asthma | Unadjusted RR (95% CI) | Adjusted RR (95 % CI) <sup>a</sup> | Adjusted RR (95 % CI) <sup>a,b</sup> |
| Neither                                         | 372,992 | 3.4      | 1                      | 1                                  | 1                                    |
| Preterm birth only                              | 17,586  | 6.0      | 1.74 (1.64, 1.85)      | 1.67 (1.57, 1.77)                  | 1.67 (1.57, 1.77)                    |
| Pre-eclampsia only                              | 12,466  | 4.4      | 1.28 (1.17, 1.39)      | 1.22 (1.12, 1.32)                  | 1.21 (1.12, 1.32)                    |
| Preeclampsia and preterm birth                  | 3,863   | 6.4      | 1.87 (1.65, 2.11)      | 1.80 (1.59, 2.03)                  | 1.80 (1.59, 2.03)                    |
| Relative excess risk due to interaction         |         |          | -0.15 (-0.42, 0.12)    |                                    |                                      |
| <b>MoBa (n=45,028)</b>                          |         |          |                        |                                    |                                      |
| Pre-eclampsia                                   | n       | % asthma | Unadjusted RR (95% CI) | Adjusted RR (95 % CI) <sup>c</sup> |                                      |
| No                                              | 43,281  | 4.8      | 1                      | 1                                  |                                      |
| Yes                                             | 1,747   | 6.4      | 1.33 (1.11, 1.60)      | 1.20 (1.00, 1.45)                  |                                      |
| Pre-eclampsia in combination with preterm birth | n       | % asthma | Unadjusted RR (95% CI) | Adjusted RR (95 % CI) <sup>c</sup> |                                      |
| Neither                                         | 41,645  | 4.7      | 1                      | 1                                  |                                      |
| Preterm birth only                              | 1,636   | 7.1      | 1.51 (1.26, 1.82)      | 1.41 (1.18, 1.69)                  |                                      |
| Pre-eclampsia only                              | 1,352   | 5.3      | 1.12 (0.89, 1.41)      | 1.02 (0.81, 1.29)                  |                                      |
| Preeclampsia and preterm birth                  | 395     | 10.1     | 2.16 (1.61, 2.91)      | 1.89 (1.41, 2.52)                  |                                      |
| Relative excess risk due to interaction         |         |          |                        |                                    |                                      |

<sup>a</sup> Adjusted for maternal age, parity, education, asthma and child gender.

<sup>b</sup> Additional adjustment for maternal smoking during pregnancy available for 84% of the study population.

<sup>c</sup> Adjusted for maternal age, parity, education, asthma and child gender, maternal smoking during pregnancy and pre-pregnancy body-mass index.

Table E3 Relative risks of asthma at 7 years in children born to mothers with pre-eclampsia when stratified by parity

| <b>Registry linkage (n=406,907)</b> |               |         |          |                        |                                    |
|-------------------------------------|---------------|---------|----------|------------------------|------------------------------------|
| Nulliparous<br>(n= 164,683)         | Pre-eclampsia | N       | % asthma | Unadjusted RR (95% CI) | Adjusted RR (95 % CI) <sup>a</sup> |
|                                     | No            | 154,958 | 3.7      | 1                      | 1                                  |
|                                     | Yes           | 9,725   | 4.9      | 1.35 (1.23, 1.48)      | 1.31 (1.19, 1.43)                  |
| Parous<br>(n= 242,224)              | Pre-eclampsia | N       | % asthma | Unadjusted RR (95% CI) | Adjusted RR (95 % CI) <sup>a</sup> |
|                                     | No            | 235,620 | 3.5      | 1                      | 1                                  |
|                                     | Yes           | 6,604   | 4.8      | 1.37 (1.23, 1.53)      | 1.33 (1.19, 1.48)                  |
| <b>MoBa (n=45,028)</b>              |               |         |          |                        |                                    |
| Nulliparous<br>(n= 19,511)          | Pre-eclampsia | N       | % asthma | Unadjusted RR (95% CI) | Adjusted RR (95 % CI) <sup>b</sup> |
|                                     | No            | 18,413  | 4.9      | 1                      | 1                                  |
|                                     | Yes           | 1,098   | 6.5      | 1.33 (1.05, 1.68)      | 1.20 (0.94, 1.52)                  |
| Parous<br>(n= 25,517)               | Pre-eclampsia | N       | % asthma | Unadjusted RR (95% CI) | Adjusted RR (95 % CI) <sup>b</sup> |
|                                     | No            | 24,868  | 4.7      | 1                      | 1                                  |
|                                     | Yes           | 649     | 6.2      | 1.31 (0.96, 1.77)      | 1.21 (0.89, 1.64)                  |

<sup>a</sup> Adjusted for maternal age, education, asthma and child gender.

<sup>b</sup> Adjusted for maternal age, education, asthma and child gender, maternal smoking during pregnancy and pre-pregnancy body-mass index.

Table E4 Relative risks of maternal report of current doctor diagnosed asthma at 7 years in children born to mothers with pre-eclampsia

| Pre-eclampsia                                   | n      | % asthma | Unadjusted RR (95% CI) | Adjusted RR (95 % CI) <sup>a</sup> |
|-------------------------------------------------|--------|----------|------------------------|------------------------------------|
| No                                              | 25,508 | 5.7      | 1                      | 1                                  |
| Yes                                             | 988    | 8.6      | 1.52 (1.23, 1.88)      | 1.37 (1.10, 1.71)                  |
| Pre-eclampsia in combination with preterm birth | N      | % asthma | Unadjusted RR (95% CI) | Adjusted RR (95 % CI) <sup>a</sup> |
| Neither                                         | 24,525 | 5.5      | 1                      | 1                                  |
| Preterm birth only                              | 983    | 9.4      | 1.69 (1.38, 2.08)      | 1.60 (1.26, 2.02)                  |
| Pre-eclampsia only                              | 760    | 6.9      | 1.26 (0.95, 1.65)      | 1.11 (0.82, 1.51)                  |
| Preeclampsia and preterm birth                  | 228    | 14.1     | 2.56 (1.85, 3.54)      | 2.62 (1.77, 3.89)                  |
| Relative excess risk due to interaction         |        |          | 0.61 (-0.34, 1.55)     | 0.91 (-0.22, 2.05)                 |

<sup>a</sup> Adjusted for maternal age, parity, education, asthma and child gender, maternal smoking during pregnancy and pre-pregnancy body-mass index.

Table E5 Logistic regression model of the direct and indirect effects through preterm birth, low birth weight and delivery by caesarean section of pre-eclampsia on asthma at 7 years

| <b>Registry linkage (n=406,907)</b> |                                  |              |
|-------------------------------------|----------------------------------|--------------|
| Component                           | Adjusted Odds Ratio <sup>a</sup> | (95% CI)     |
| Direct Effect                       | 1.11                             | (1.04, 1.18) |
| Indirect Effect                     | 1.21                             | (1.18, 1.24) |
| Total Effect                        | 1.34                             | (1.26, 1.43) |
| <b>MoBa (n=45,028)</b>              |                                  |              |
| Component                           | Adjusted Odds Ratio <sup>b</sup> | (95% CI)     |
| Direct Effect                       | 1.03                             | (0.83, 1.27) |
| Indirect Effect                     | 1.19                             | (1.11, 1.27) |
| Total Effect                        | 1.22                             | (0.98, 1.52) |

<sup>a</sup> Adjusted for maternal age, parity, education, asthma and child gender.

<sup>b</sup> Adjusted for maternal age, parity, education, asthma and child gender, maternal smoking during pregnancy and pre-pregnancy body-mass index.
